# Supplementary material for: Quantifying the Effect of Light Intensity Uniformity on the Crop Yield by Pea Microgreens Growth Experiments
Source: MDPI journal article supplement (doi:10.3390/horticulturae9111187), 2023-10-30
Supplement: s1 [file s1]

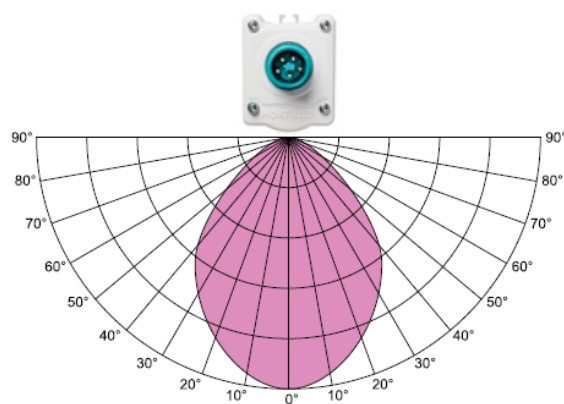

**Figure S1.** Photon intensity distribution of the luminaire with 80° beam angle used in the experiments (<https://www.hortilux.com/product/hortiled-multi-4dim/>).

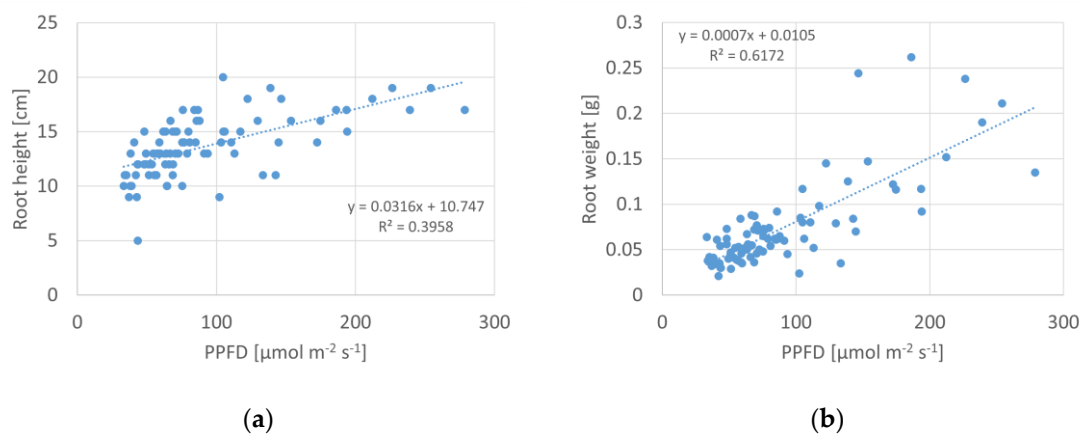

**Figure S2.** Individual shoot height (a) and root weight (b) as a function of local PPFD for tray B6.

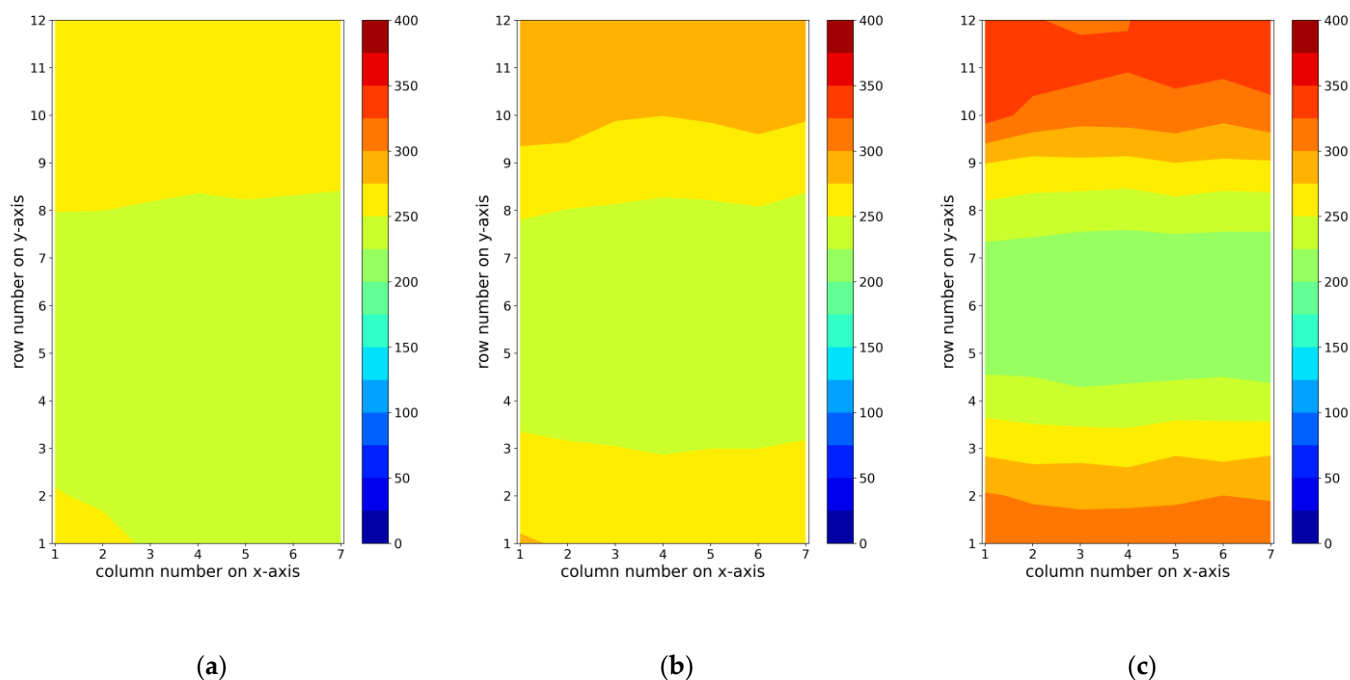

**Figure S3.** PPFD distribution at the canopy level on tray A. The separation distance between the top leaves and the luminaire (shoot height): (a) 45 (0) cm; (b) 39 (6) cm; (c) 33 (12) cm.

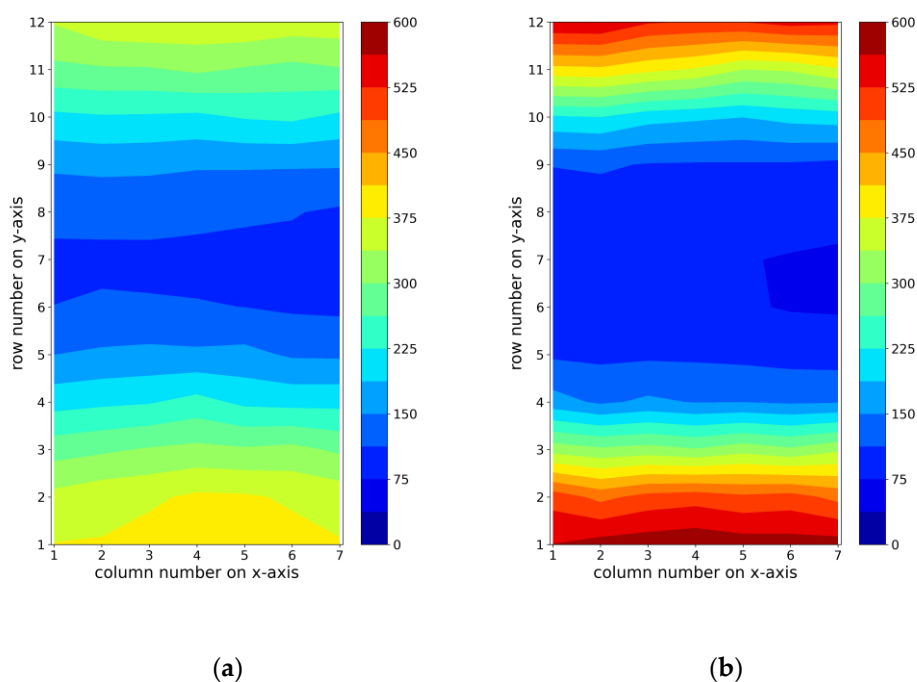

**Figure S4.** PPFD distribution at the canopy level on tray B1. The separation distance between the top leaves and the luminaire (shoot height): (a) 21 (0) cm; (b) 15 (6) cm.

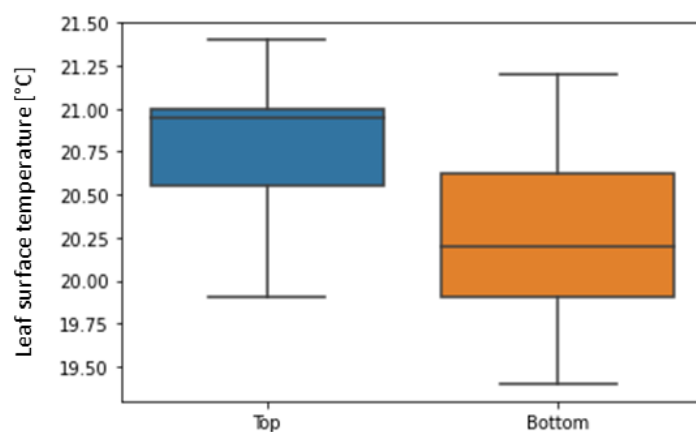

**Figure S5.** Leaf surface temperature on the top and bottom of a seedling with a height of 17 cm on tray B1. The separation distance between the top leaf and the luminaire was 4 cm. The sample size was 16 in both cases. The difference between the mean temperatures is statistically significant at  $p = 0.003$ .

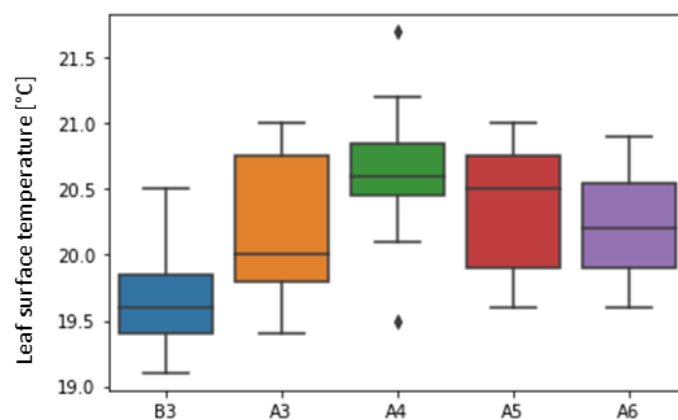

**Figure S6.** Variation of leaf surface temperature on various trays of the vertical farm. Measurements were taken at 19 randomly selected positions on each tray.
